# Supplementary material
Source: PubMed Central journal article supplement (PMC4191931)

# Supplemental Figure 2

**a.**

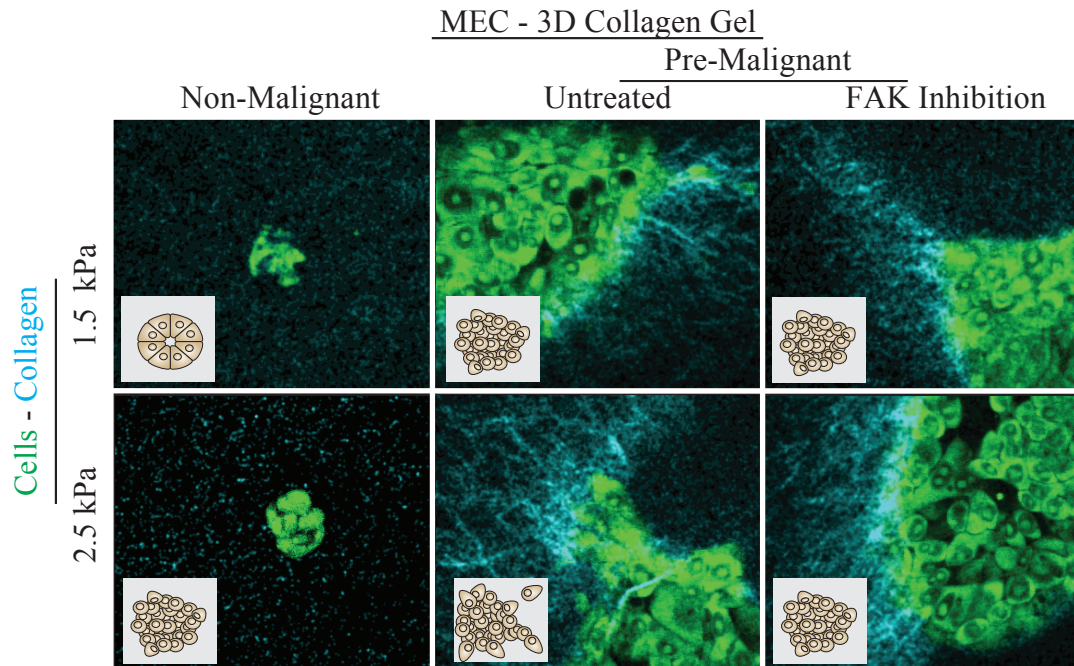

**b.**

Rat Tail Collagen Fibers

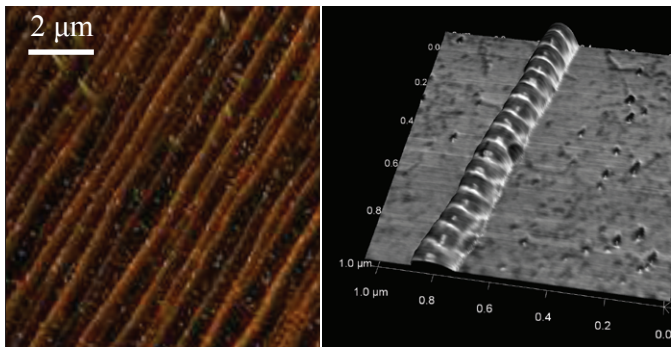

Atomic Force Microscopy: Non-Contact Imaging

**c.**

Rat Tail Collagen Fibers

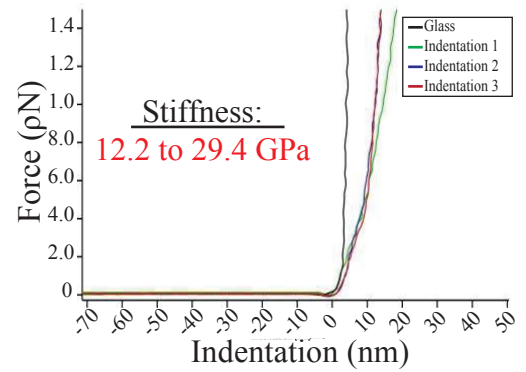

Supplement: NIHMS598973-supplement-Supplementary_Figure_2.pdf [file NIHMS598973-supplement-Supplementary_Figure_2.pdf]
