# Supplementary material
Source: PubMed Central journal article supplement (PMC4191931)

# Supplemental Figure 1

**a.**

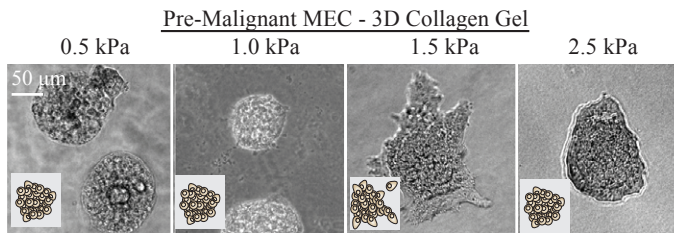

**b.**

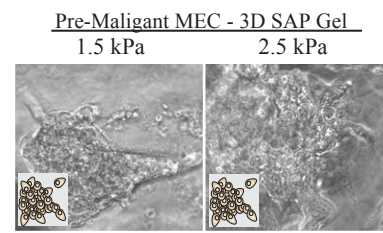

**c.**

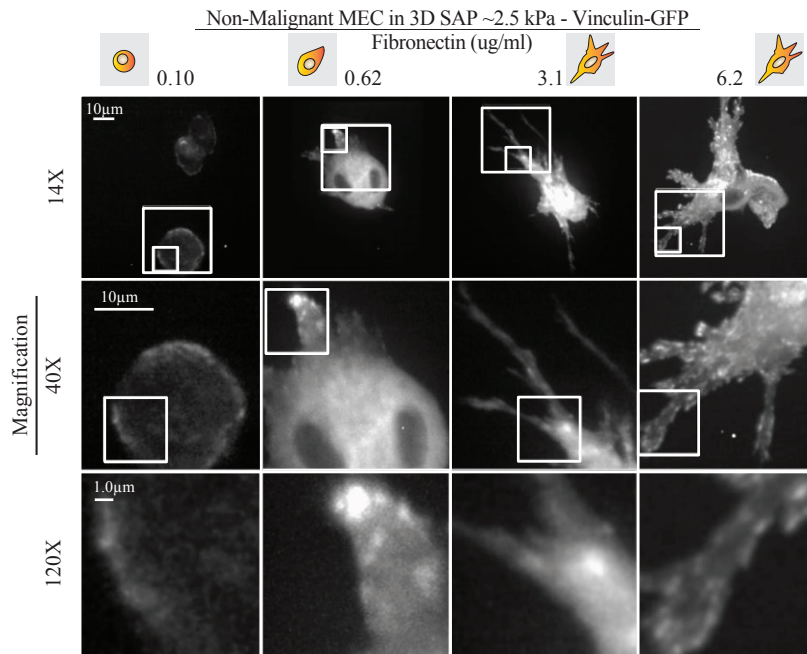

**d.**

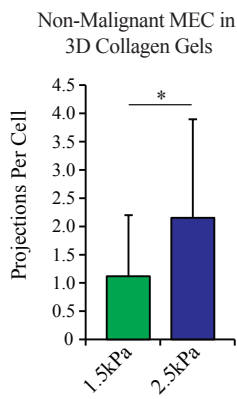

**e.**

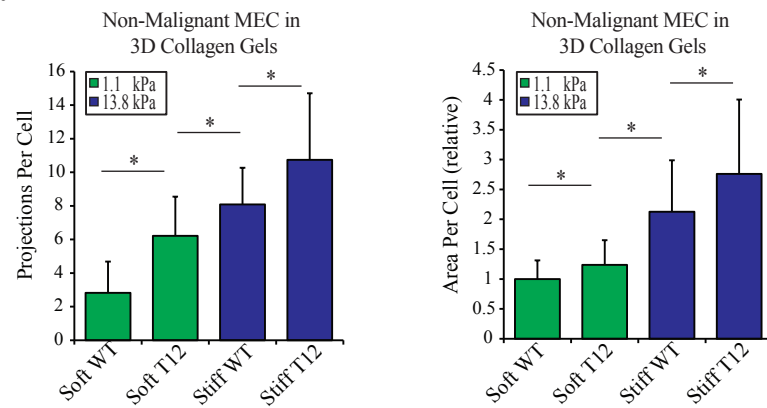

Supplement: NIHMS598973-supplement-Supplementary_Figure_1.pdf [file NIHMS598973-supplement-Supplementary_Figure_1.pdf]

# Supplemental Figure 3

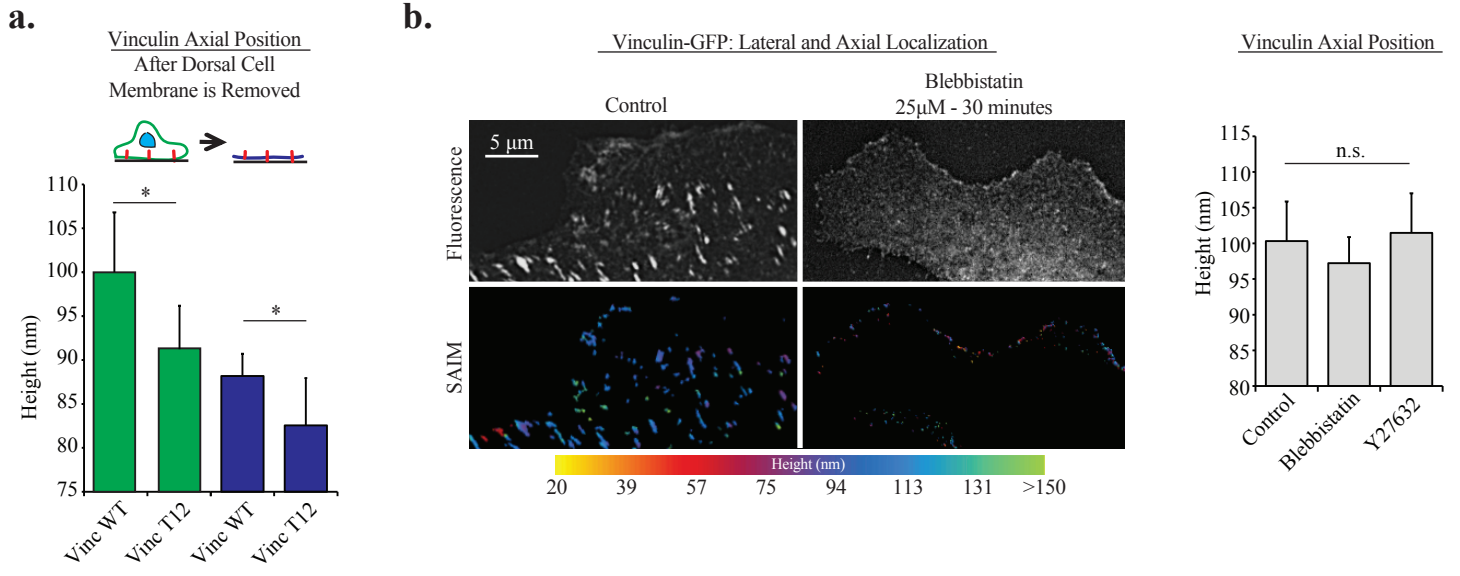

Supplement: NIHMS598973-supplement-Supplementary_Figure_3.pdf [file NIHMS598973-supplement-Supplementary_Figure_3.pdf]

# Supplemental Figure 4

**a.**

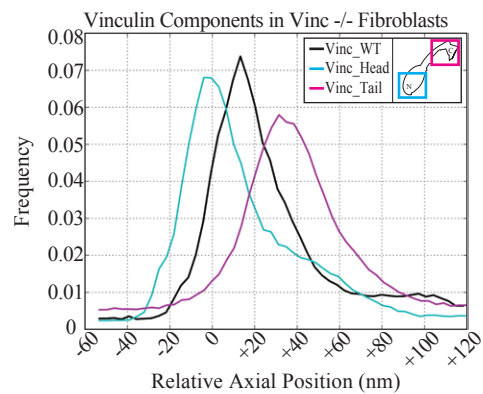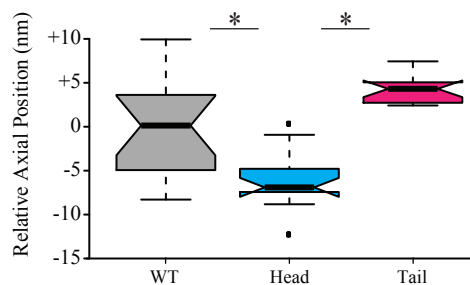

**b.**

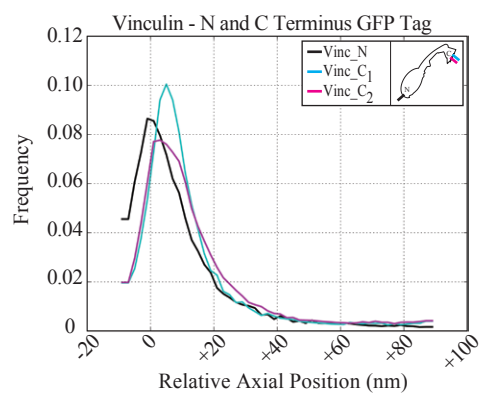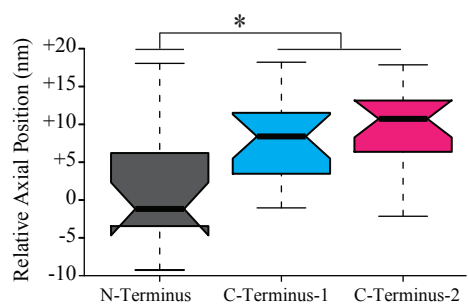

Supplement: NIHMS598973-supplement-Supplementary_Figure_4.pdf [file NIHMS598973-supplement-Supplementary_Figure_4.pdf]

# Supplemental Figure 5

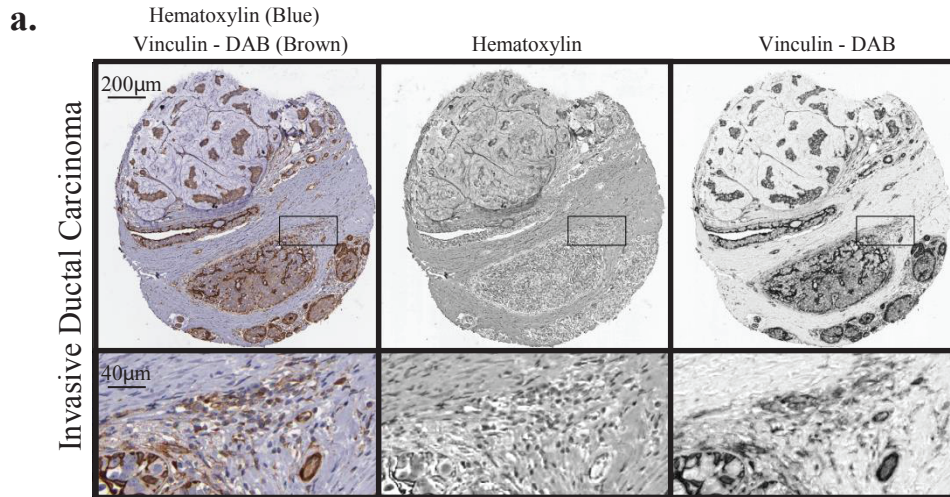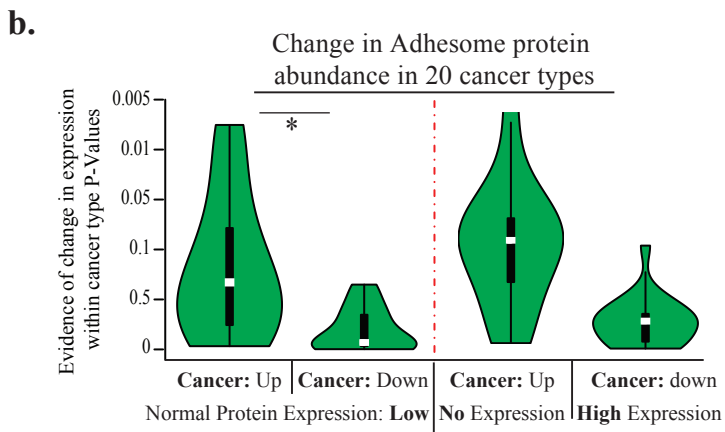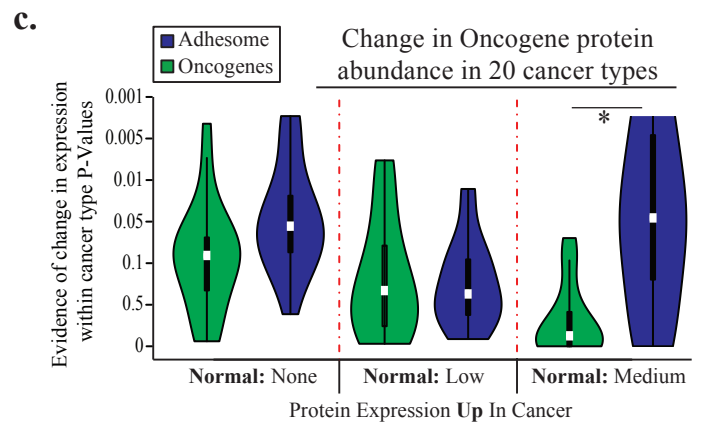

Supplement: NIHMS598973-supplement-Supplementary_Figure_5.pdf [file NIHMS598973-supplement-Supplementary_Figure_5.pdf]
